# Supplementary material for: Preparation of polyoxometalate stabilized gold nanoparticles and composite assembly with graphene oxide: enhanced electrocatalytic performance
Source: Royal Society of Chemistry journal article supplement (doi:10.1039/c5nj01983d), 2015-12-01
Supplement: c5nj01983d1.pdf [file c5nj01983d1.pdf]

### Supporting Information:

#### Preparation of polyoxometalate stabilized gold nanoparticles and composite assembly with graphene oxide: enhanced electrocatalytic performance

Lin Suo, Wenmei Gao, Yu Du, Ruiqiang Wang, Lixin Wu, Lihua Bi\*

**Table S1.** The difference of anode and cathode currents for four composite films.

| Film number | Wave | Anode current<br>( $\mu\text{A}$ ) | Cathode current<br>( $\mu\text{A}$ ) | Current difference<br>( $\mu\text{A}$ ) |
|-------------|------|------------------------------------|--------------------------------------|-----------------------------------------|
| Film 1      | I    | 18.14                              | 30.12                                | 11.98                                   |
|             | II   | 11.76                              | 20.14                                | 8.38                                    |
| Film 3      | I    | 25.98                              | 41.25                                | 15.27                                   |
|             | II   | 12.92                              | 27.01                                | 14.09                                   |
| Film 4      | I    | 19.07                              | 43.94                                | 24.87                                   |
|             | II   | 1.01                               | 43.55                                | 42.54                                   |
| Film 5      | I    | 0.53                               | 58.16                                | 57.63                                   |
|             | II   | 19.37                              | 62.02                                | 42.65                                   |

Note: All the currents are taken with absolute value.

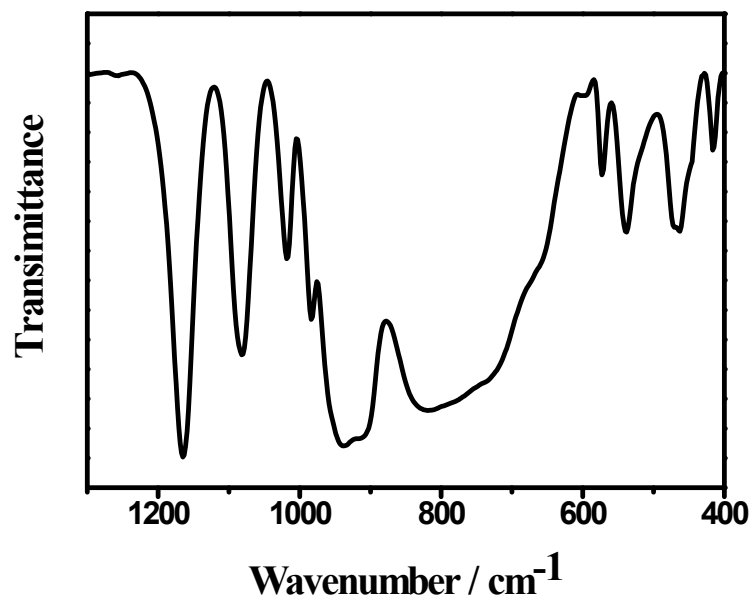

**Fig. S1.** IR spectrum of P<sub>5</sub>W<sub>30</sub> in KBr pellet.

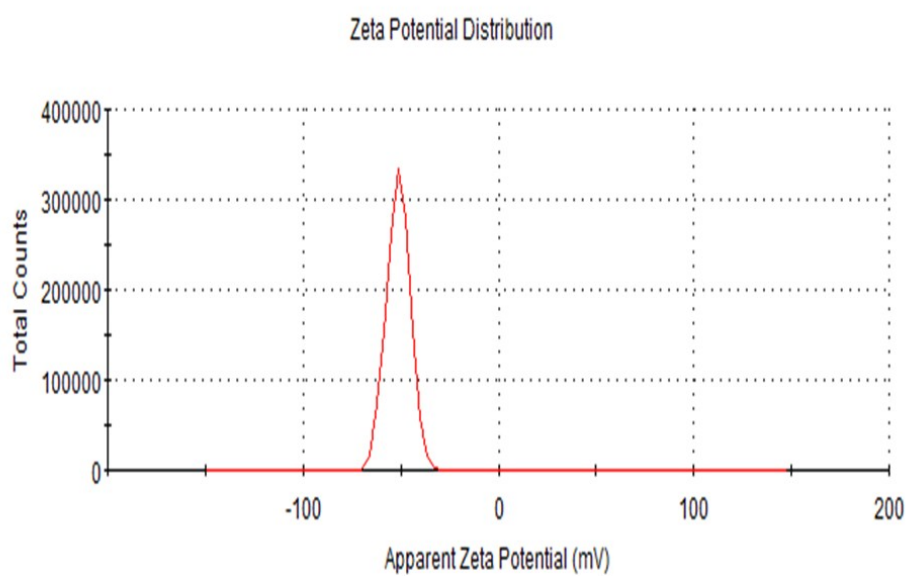

**Fig. S2.** Zeta potential pattern of the Au@P<sub>5</sub>W<sub>30</sub> NPs in water.

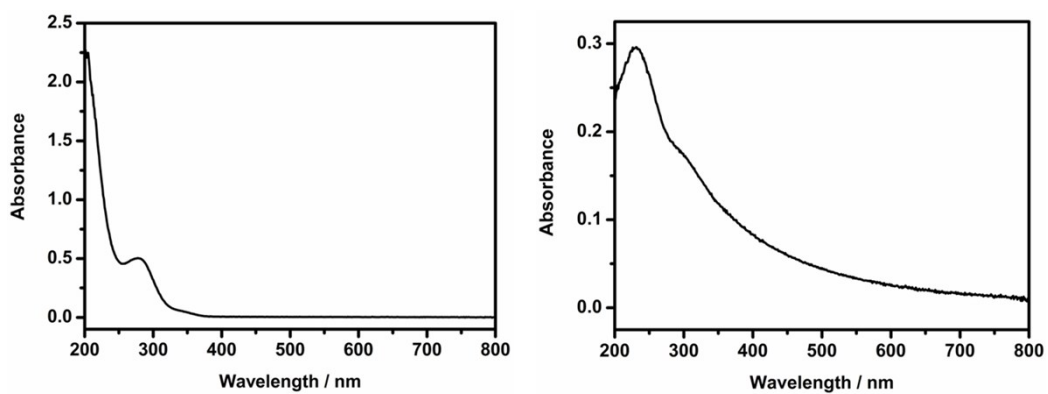

**Fig. S3.** UV-vis spectra of P<sub>5</sub>W<sub>30</sub> ( $5 \times 10^{-6}$  mM) (left) and GO (right) in aqueous solutions.
